# Supplementary material for: Acquisition-dependent modulation of hippocampal neural cell adhesion molecules by associative motor learning
Source: PubMed Central journal article supplement (PMC9811386; doi:10.3389/fnana.2022.1082701), 2022-12-21
Supplement: Table_1.pdf [file Table_1.pdf]

**Supplementary Table 1.** Effects of context or unpaired CS-US stimulation on neuronal cell adhesion molecules expression in the hippocampus.

| SESSION         | SIDE   | GROUP    | PSA-NCAM      | L1            | NCAM          |
|-----------------|--------|----------|---------------|---------------|---------------|
| 1 <sup>st</sup> | ipsi   | context  | 0.217 ± 0.005 | 0.353 ± 0.015 | 0.665 ± 0.025 |
|                 |        | unpaired | 0.206 ± 0.010 | 0.356 ± 0.004 | 0.643 ± 0.009 |
|                 | contra | context  | 0.215 ± 0.014 | 0.357 ± 0.017 | 0.623 ± 0.029 |
|                 |        | unpaired | 0.213 ± 0.011 | 0.358 ± 0.005 | 0.625 ± 0.017 |
| 3 <sup>rd</sup> | ipsi   | context  | 0.203 ± 0.009 | 0.351 ± 0.012 | 0.676 ± 0.016 |
|                 |        | unpaired | 0.198 ± 0.008 | 0.348 ± 0.006 | 0.656 ± 0.014 |
|                 | contra | context  | 0.215 ± 0.006 | 0.349 ± 0.011 | 0.640 ± 0.023 |
|                 |        | unpaired | 0.210 ± 0.006 | 0.355 ± 0.009 | 0.628 ± 0.014 |
| 6 <sup>th</sup> | ipsi   | context  | 0.195 ± 0.008 | 0.352 ± 0.004 | 0.665 ± 0.010 |
|                 |        | unpaired | 0.198 ± 0.012 | 0.352 ± 0.005 | 0.646 ± 0.021 |
|                 | contra | context  | 0.201 ± 0.010 | 0.349 ± 0.009 | 0.665 ± 0.019 |
|                 |        | unpaired | 0.196 ± 0.008 | 0.349 ± 0.008 | 0.643 ± 0.018 |

Results are determined by ELISAs in hippocampal synaptosomes and expressed as the optical density obtained by measuring absorbance at 492 nm. Data is expressed as the mean ± SEM for each session (1st: unpaired group n = 6 and context group n = 4; 3rd: unpaired group n = 6 and context group n = 5; 6th: unpaired group n = 6 and context group n = 4). ipsi: ipsilateral hippocampus (to CS-US presentation); contra: contralateral.
